# Supplementary material for: Microwave-assisted phenolation of acid-insoluble Klason lignin and its application in adhesion
Source: Royal Society of Chemistry journal article supplement (doi:10.1039/d1gc04783c), 2022-01-01
Supplement: d1gc04783c1.pdf [file d1gc04783c1.pdf]

## Supplementary Information

# **Microwave-assisted phenolation of acid-insoluble Klason lignin and its application to adhesion**

Ngoc Tuan Tran,<sup>a,b</sup> Youngpyo Ko,<sup>c,d</sup> Sungsoo Kim,<sup>e</sup> Janghyuk Moon,<sup>e</sup> Jae-Wook Choi,<sup>a</sup> Kwang  
Ho Kim,<sup>a,b</sup> Chang Soo Kim,<sup>a,b</sup> Jeong-Myeong Ha,<sup>a,b</sup> Heesuk Kim,<sup>d</sup> Keunhong Jeong,<sup>f</sup> Hyunjoo  
Lee<sup>a,b,\*</sup> and Chun-Jae Yoo<sup>a,\*</sup>

<sup>a</sup>Clean Energy Research Center, Korea Institute of Science and Technology, Seoul 02792,  
Republic of Korea

<sup>b</sup>Division of Energy & Environment Technology, KIST School, Korea University of Science and  
Technology, Seoul 02792, Republic of Korea

<sup>c</sup>KU-KIST Graduate School of Converging Science and Technology, Korea University, Seoul,  
02841, Republic of Korea Address here.

<sup>d</sup>Soft Hybrid Materials Research Center, Korea Institute of Science and Technology, Seoul, 02792,  
Republic of Korea

<sup>e</sup>School of Energy Systems Engineering, Chung-Ang University, Heukseok-Ro, Dongjak-Gu,  
Seoul 06974, Republic of Korea.

<sup>f</sup>Department of Chemistry, Korea Military Academy, Seoul 01805, Republic of Korea

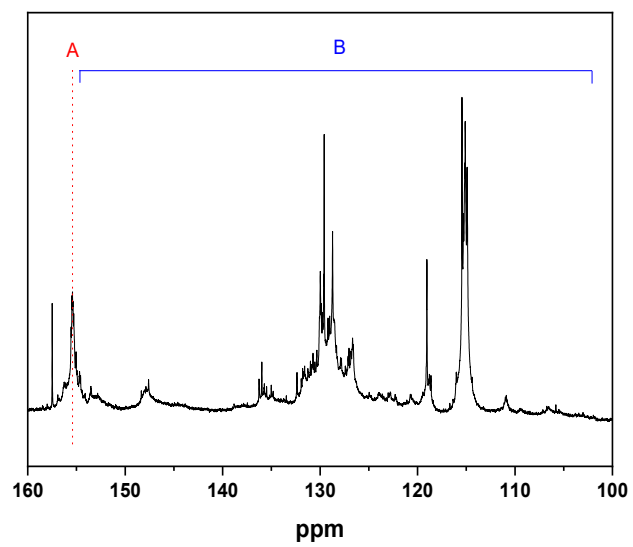

**Fig. S1**  $^{13}\text{C}$  NMR spectrum of the phenolated Klason lignin.

**Table S1.**  $^{13}\text{C}$  NMR peak assignment for lignin unit after phenolation.

| $\delta$ (ppm) | Assignment <sup>a</sup>                           |
|----------------|---------------------------------------------------|
| 156.0 – 158.0  | C1 in p-H (e and ne)                              |
| 153.0 – 150.3  | C2, C6 in S (e)                                   |
| 150.0 – 145.0  | C1, C2 in G (e and ne); C2, C6 in S (ne)          |
| 136.3 – 131.0  | C1 in S (e and ne); C4 in p-H, G and S (e and ne) |
| 130.0 – 126.0  | C3, C5 in p-H (e and ne)                          |
| 119.0          | C5 in G (e and ne)                                |
| 116.0 – 114.0  | C6 in G (e and ne), C2, C6 of p-H (e and ne)      |
| 111.7          | C3 in G (e and ne)                                |
| 104.0 – 103.0  | C3, C5 in S (e and ne)                            |

<sup>a</sup> 'e' stand for etherified and 'ne' for non-etherified

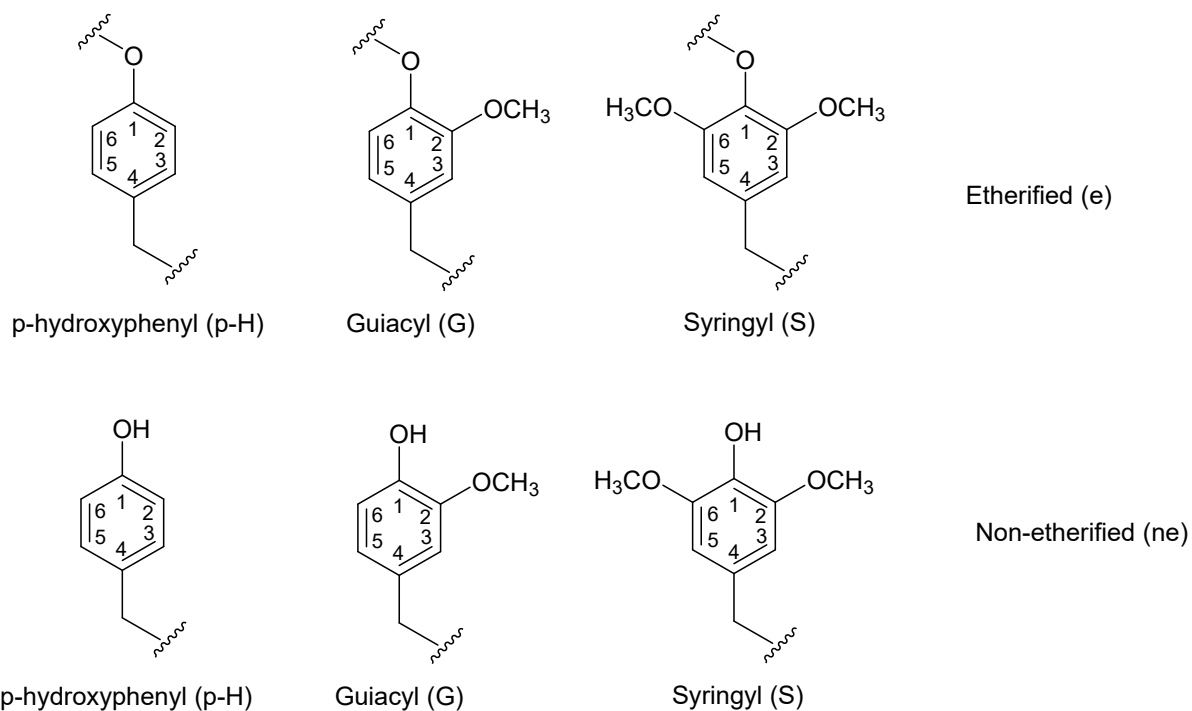

**Table S2.**  $^{13}\text{C}$  NMR peak assignment for new phenyl group in lignin sample after phenolation.

| $\delta$ (ppm) | Assignment                           |
|----------------|--------------------------------------|
| 157.5          | C1 of remained phenol                |
| 155            | C1 of o-P and C1 of p-P              |
| 125 - 137      | C2, C3, C5 of o-P; C3, C4, C5 of p-P |
| 120            | C4 of o-P                            |
| 115            | C6 of o-P and C2, C6 of p-P          |

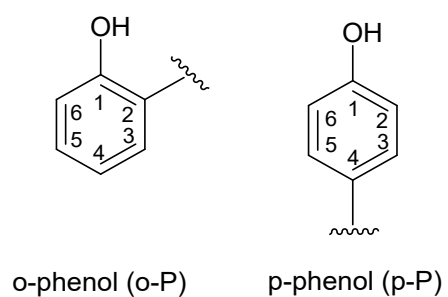

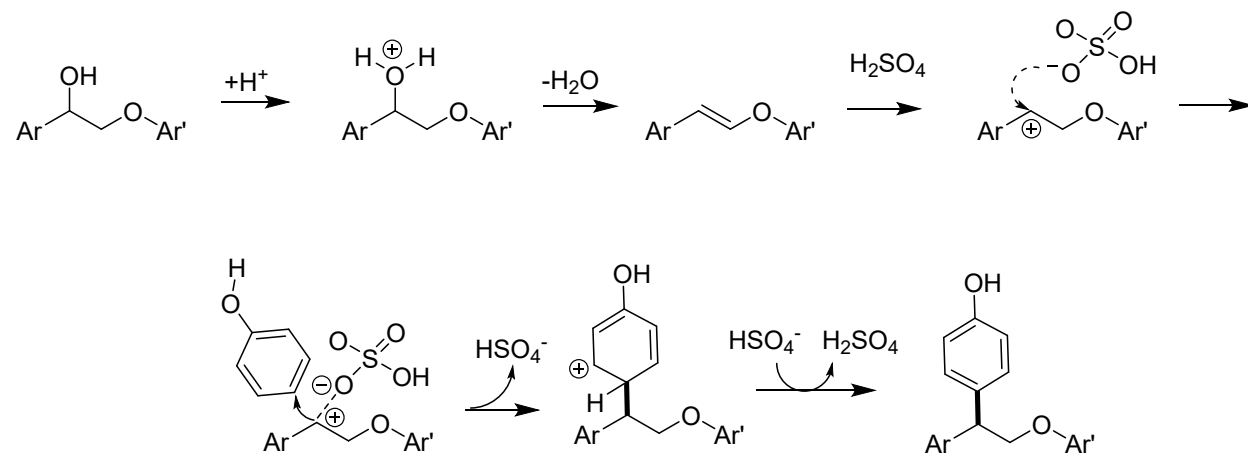

**Fig. S2** Proposed reaction mechanism for the phenolation of lignin

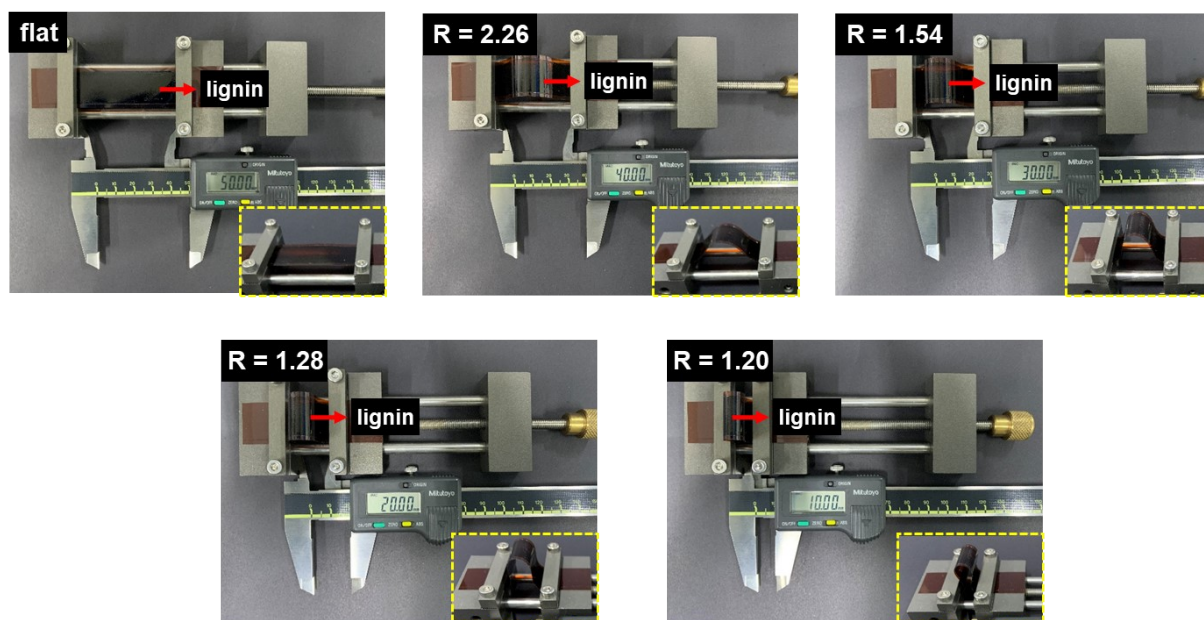

$$R = \frac{L^2 + A^2}{2A} \text{ (cm)}$$

R : bending radius, L : half of device length, A : elevation distance

**Fig. S3** Photographs showing the bending tests of the phenolated lignins on PEN and PI substrates as a function of the bending radius.

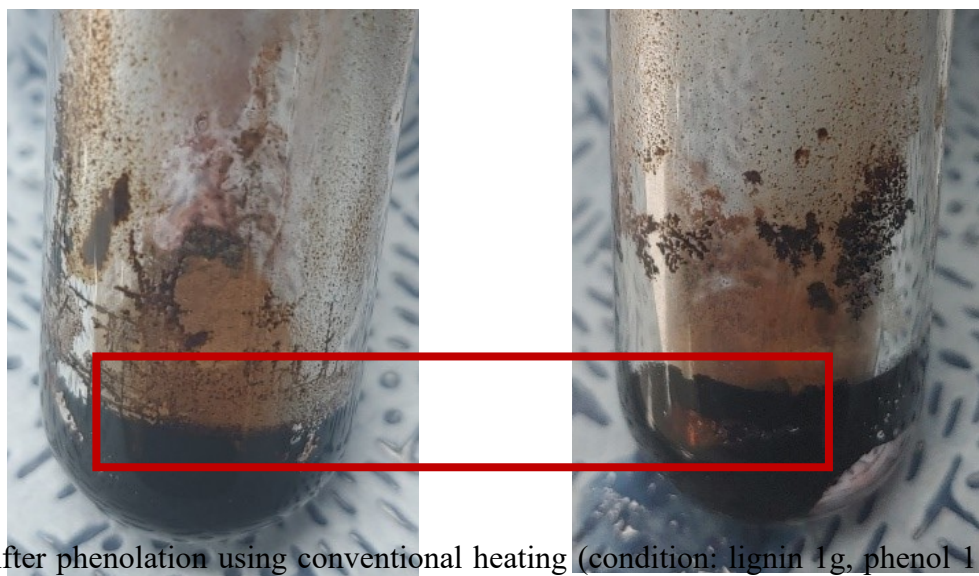

**Fig. S4** After phenolation using conventional heating (condition: lignin 1g, phenol 1 g, 0.150 g  $\text{H}_2\text{SO}_4$  as catalyst,  $100^\circ\text{C}$  for 4 hours (left) and 6 hours (right)), reaction mixture show two saperated phase, upper layer is original lignin, which have not dissolve into melted phenol (red box), and lower layer is the reacted mixture of lignin and phenol.

| Reaction condition | Ar-H (mmol/g) |
|--------------------|---------------|
| 80°C, 10 min       | 0.86          |
| 80°C, 30 min       | 1.07          |
| 80°C, 60 min       | 1.36          |

**Table S3:**  $^1\text{H}$  NMR and  $^{31}\text{P}$  NMR analysis of phenolation lignin

Reaction at 80°C shown lignin solid particle after reaction, but there is still increasing in Ar-H due to the phenolation reaction.



Since guaiacyl and syringyl units contain methoxy functional group, the ratios of aromatic/methoxy (Ar/OMe) of phenolated lignin were calculated by  $^{13}\text{C}$ -NMR, where the Ar/OMe increased with phenol to lignin feed ratios. Considering the similar Ar-H and Ar-OH concentration with increasing phenol to lignin feed ratios (Table 1), increasing Ar/OMe infers that lignin unit containing OMe might be substituted by phenol molecules.

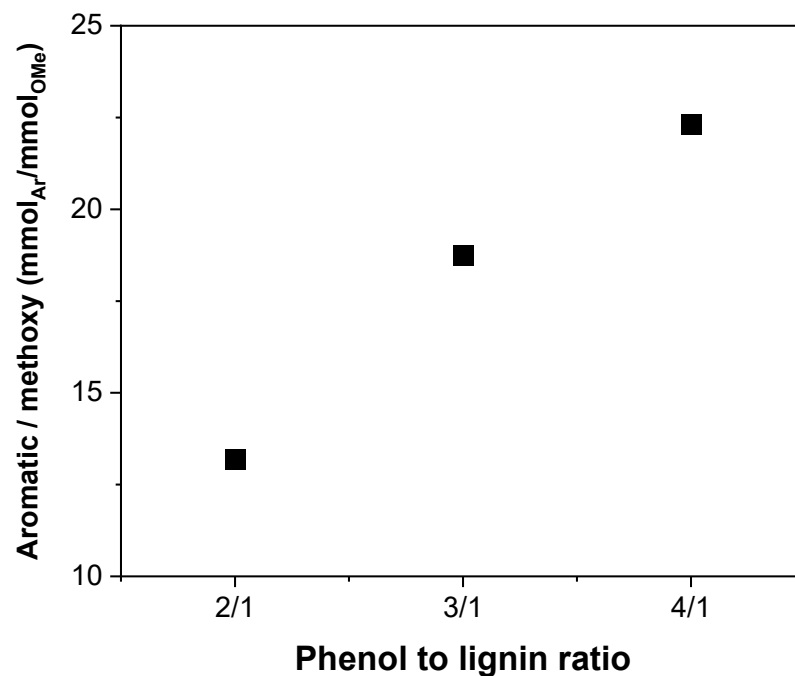

**Fig. S5** Aromatic/methoxy of phenolated lignin along with phenol to lignin feed ratios. Reaction conditions: 100°C for 5 min

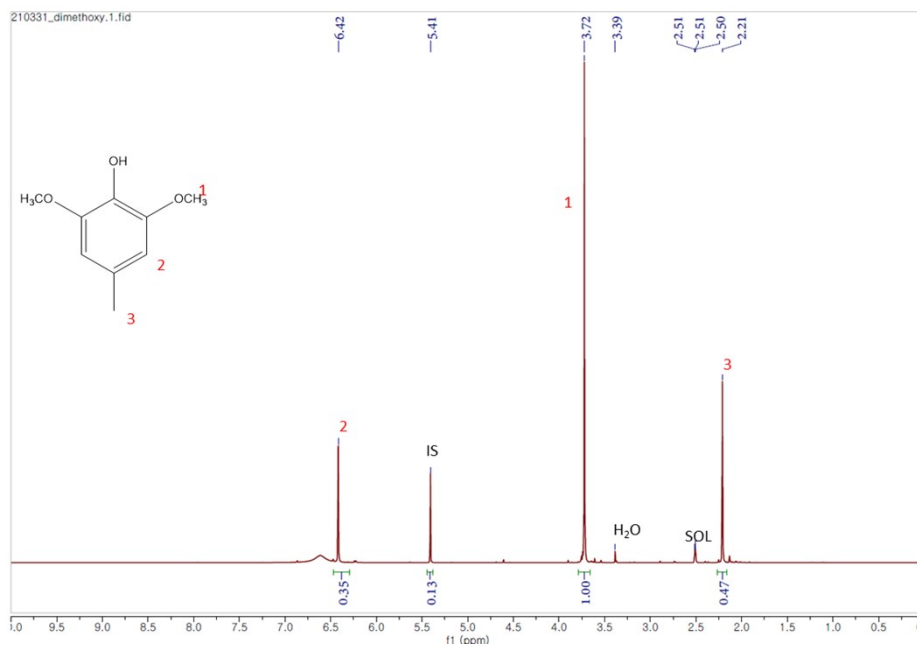

**Fig. S6.** The <sup>1</sup>H-NMR of 4-methyl-2,6-dimethoxyphenol under 15 wt.% H<sub>2</sub>SO<sub>4</sub> at 100 °C for 5 min microwave irradiation.

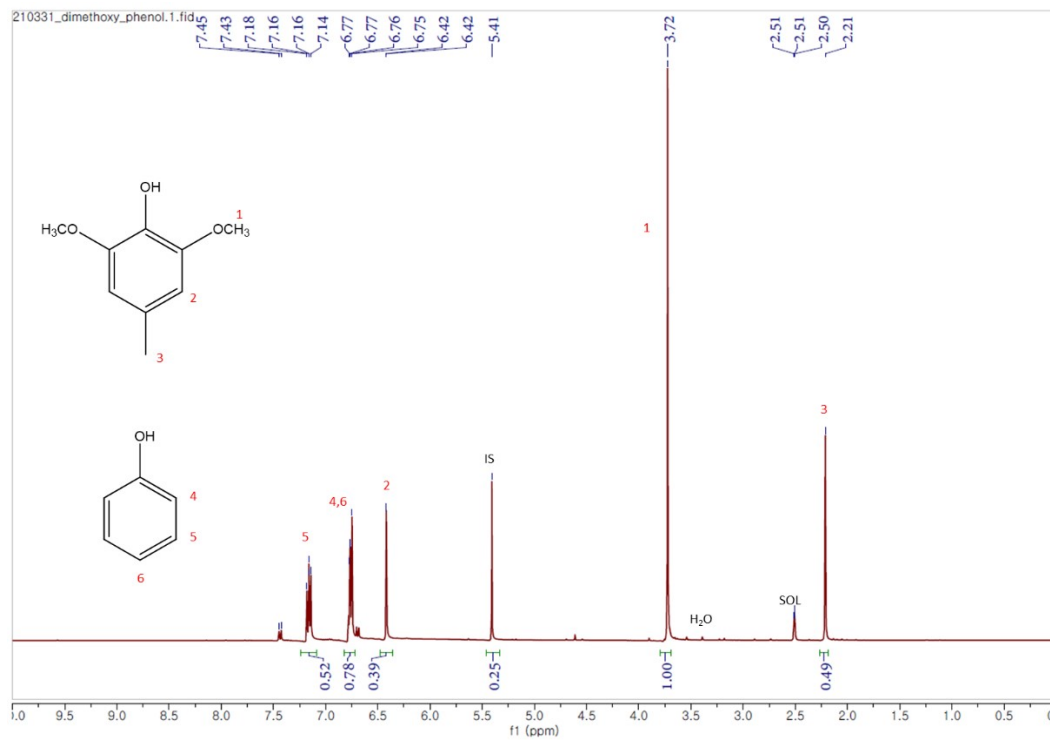

**Fig. S7.** The  $^1\text{H-NMR}$  of product after reaction between 4-methyl-2,6-dimethoxyphenol and phenol (1/1, w/w) under 15 wt.%  $\text{H}_2\text{SO}_4$  at 100 °C for 5 min microwave irradiation.

**Table S4.**  $M_w$  (g/mol) and polydispersity ( $\mathcal{D}$ ) of the phenolated lignin as a function of reaction

| Reaction time (min) | $M_w$ (g/mol) <sup>a</sup> | Polydispersity ( $\mathcal{D}$ ) | $T_g$ (°C) |
|---------------------|----------------------------|----------------------------------|------------|
| 5                   | 1058                       | 2.2                              | 117        |
| 10                  | 911                        | 1.8                              | 110        |
| 15                  | 1013                       | 1.8                              | 115        |

time. Reaction conditions: 100°C, phenol:lignin = 2:1

## Cartesian Coordinates Information

### Result

#### 1) Basis set : 6-31+G(d)

##### 1-1) Normal Optimization (without electric field)

|   |             |             |             |
|---|-------------|-------------|-------------|
| C | 3.78837400  | -2.00985800 | 0.70639400  |
| C | 3.33937600  | -1.57148900 | 1.95451800  |
| C | 2.17440300  | -0.80810000 | 2.05820700  |
| C | 1.43151500  | -0.46253000 | 0.92182400  |
| C | 1.88447300  | -0.91999100 | -0.32614000 |
| C | 3.04441000  | -1.68441500 | -0.44506300 |
| H | 3.90684900  | -1.82085100 | 2.84834700  |
| H | 1.84706200  | -0.47920200 | 3.04115300  |
| H | 1.35035700  | -0.69312700 | -1.24470700 |
| O | 3.48264300  | -2.04953300 | -1.69895300 |
| C | 3.32225500  | -3.44303000 | -2.02699500 |
| H | 2.26066300  | -3.71700300 | -2.00574200 |
| H | 3.71276400  | -3.56085900 | -3.03950800 |
| H | 3.88671100  | -4.07602400 | -1.33554700 |
| O | 4.93256600  | -2.73927300 | 0.53583700  |
| H | 5.35378100  | -2.90425400 | 1.39585800  |
| C | 0.16401800  | 0.36291900  | 1.07218700  |
| C | -1.06229800 | -0.37557000 | 0.52308000  |
| H | -0.96496700 | -0.60314600 | -0.54564500 |
| H | -1.16273600 | -1.32417100 | 1.06512400  |
| O | -2.20486000 | 0.44833900  | 0.74554500  |
| C | -3.44364600 | -0.01716400 | 0.36567300  |
| C | -3.67603100 | -1.27077200 | -0.20666800 |
| C | -4.51937400 | 0.85539400  | 0.58979600  |
| C | -4.98613700 | -1.63813200 | -0.54861900 |
| H | -2.86587500 | -1.96781500 | -0.38985000 |
| C | -5.81114400 | 0.46985200  | 0.24292900  |
| H | -4.32725100 | 1.82723700  | 1.03617600  |
| C | -6.07423700 | -0.78637300 | -0.33489800 |
| H | -5.15093300 | -2.61764600 | -0.99231400 |
| H | -6.63308300 | 1.15936000  | 0.42495900  |
| C | -7.48335300 | -1.19047800 | -0.70716300 |
| H | -7.91304300 | -0.50740800 | -1.45106600 |
| H | -7.50829500 | -2.20103800 | -1.12791800 |
| H | -8.14877500 | -1.17403200 | 0.16534100  |
| C | 2.27087200  | 3.41815500  | -0.81142200 |
| C | 1.33317300  | 2.69304100  | -1.60755300 |
| C | 0.39234700  | 1.93161200  | -0.99009900 |

|   |             |            |             |
|---|-------------|------------|-------------|
| C | 0.27831200  | 1.83466000 | 0.48317100  |
| C | 1.27800000  | 2.63530900 | 1.22757300  |
| C | 2.22390500  | 3.39177600 | 0.61396000  |
| H | 1.38462700  | 2.76176700 | -2.69001900 |
| H | -0.33294200 | 1.39623200 | -1.59573900 |
| H | 1.23464500  | 2.60685300 | 2.31301300  |
| H | 2.95037800  | 3.97688700 | 1.16736600  |
| O | 3.21799200  | 4.15503000 | -1.34675000 |
| H | 3.20713800  | 4.13694500 | -2.32379700 |
| H | -0.01348900 | 0.51229600 | 2.14243700  |
| H | -0.71560400 | 2.26360200 | 0.72848300  |

1-2) X-axis (Electric field : 0.0001 au)

|   |             |             |             |
|---|-------------|-------------|-------------|
| C | 0.00000000  | 0.00000000  | 0.00000000  |
| C | 0.00000000  | 0.00000000  | 1.39744900  |
| C | 1.23213600  | 0.00000000  | -0.68460600 |
| O | -1.14035700 | 0.01331700  | -0.75072300 |
| C | 1.20006500  | -0.06357000 | 2.10663700  |
| H | -0.94544200 | 0.03026600  | 1.93399800  |
| C | 2.43044900  | -0.12818500 | 1.44072400  |
| H | 1.16601700  | -0.07213400 | 3.19297800  |
| C | 2.42287500  | -0.08116900 | 0.03720700  |
| C | 3.71212400  | -0.27804800 | 2.24348500  |
| H | 3.34162500  | -0.11268800 | -0.54126100 |
| O | 1.28871200  | -0.02317700 | -2.06013300 |
| C | 0.87896500  | 1.18910000  | -2.72352700 |
| H | 1.52820200  | 2.02062700  | -2.42388500 |
| H | 0.99341800  | 0.99861200  | -3.79219400 |
| H | -0.16424900 | 1.42728100  | -2.49867200 |
| H | -1.92397900 | 0.01189500  | -0.17555600 |
| C | 4.84836100  | 0.61091900  | 1.72983700  |
| C | 4.17772900  | -1.79917000 | 2.38337700  |
| H | 3.51088100  | 0.04432700  | 3.27064100  |
| H | 5.16218200  | 0.35120000  | 0.71211500  |
| H | 4.50013100  | 1.65100000  | 1.72717800  |
| O | 5.95207500  | 0.46004300  | 2.62447900  |
| C | 7.10327100  | 1.17090300  | 2.38598100  |
| C | 7.27539600  | 2.07116500  | 1.33018700  |
| C | 8.15408900  | 0.95381200  | 3.29117700  |
| C | 8.49831400  | 2.74415600  | 1.19213100  |
| H | 6.48123300  | 2.26498700  | 0.61806100  |
| C | 9.35888300  | 1.63319700  | 3.13523100  |
| H | 8.00845400  | 0.25441400  | 4.10986300  |
| C | 9.55885100  | 2.54428200  | 2.08123500  |

|   |             |             |             |
|---|-------------|-------------|-------------|
| H | 8.61462600  | 3.44320900  | 0.36669200  |
| H | 10.16071300 | 1.45311100  | 3.84886100  |
| C | 10.87392400 | 3.27520400  | 1.92410100  |
| H | 11.70624000 | 2.57620300  | 1.76896300  |
| H | 10.84780700 | 3.95843600  | 1.06868300  |
| H | 11.11372500 | 3.86620800  | 2.81737000  |
| C | 4.41885400  | -2.48177000 | 1.09103800  |
| C | 3.85695900  | -3.67657000 | 0.77295300  |
| C | 2.99223900  | -4.31139700 | 1.71690900  |
| C | 2.73591900  | -3.74266400 | 2.99974100  |
| O | 2.39893400  | -5.45432800 | 1.46123000  |
| H | 4.04705000  | -4.15671600 | -0.18241400 |
| H | 5.08380600  | -2.00687300 | 0.37557200  |
| C | 3.29819900  | -2.54727400 | 3.31237200  |
| H | 5.16193800  | -1.70607600 | 2.88504400  |
| H | 3.10667200  | -2.10339900 | 4.28566800  |
| H | 2.09000900  | -4.27962500 | 3.68596000  |
| H | 2.59689000  | -5.79725200 | 0.56762200  |

1-3) X-axis (Electric field : 0.001 au)

|   |             |             |             |
|---|-------------|-------------|-------------|
| C | 0.00000000  | 0.00000000  | 0.00000000  |
| C | 0.00000000  | 0.00000000  | 1.40606700  |
| C | 1.26662900  | 0.00000000  | -0.62998700 |
| O | -1.07746100 | 0.26725800  | -0.76470700 |
| C | 1.03781000  | -0.60903100 | 2.09448200  |
| H | -0.90436800 | 0.29802400  | 1.93190600  |
| C | 2.12243800  | -1.13777100 | 1.37646000  |
| H | 0.93824300  | -0.77074700 | 3.16398200  |
| C | 2.27517700  | -0.72544700 | 0.03941600  |
| C | 2.82950700  | -2.34459700 | 1.98431600  |
| H | 3.13712600  | -1.01908200 | -0.55732300 |
| O | 1.51721400  | 0.34824000  | -1.92837000 |
| C | 0.74494700  | 1.41392900  | -2.53482600 |
| H | 0.64136900  | 2.25426700  | -1.84161800 |
| H | 1.32184200  | 1.71815200  | -3.41072000 |
| H | -0.24184500 | 1.06307600  | -2.83535000 |
| H | -1.90627200 | 0.29341400  | -0.24943500 |
| C | 4.06889700  | -2.75203000 | 1.19466000  |
| C | 1.79286100  | -3.55211200 | 2.13276500  |
| H | 3.16601900  | -2.10664100 | 3.00217200  |
| H | 3.81723200  | -3.24916300 | 0.25154600  |
| H | 4.68039000  | -1.86715400 | 0.98211800  |
| O | 4.85671100  | -3.66228700 | 2.00573400  |
| C | 6.04120000  | -4.10251800 | 1.54001500  |

|   |             |             |             |
|---|-------------|-------------|-------------|
| C | 6.59564900  | -3.76581800 | 0.29290700  |
| C | 6.76455700  | -4.96263400 | 2.39413400  |
| C | 7.84332300  | -4.28522700 | -0.07669000 |
| H | 6.05779400  | -3.12725800 | -0.39789900 |
| C | 8.00137400  | -5.46558500 | 2.00546300  |
| H | 6.32118000  | -5.23516500 | 3.34766700  |
| C | 8.57186900  | -5.13873000 | 0.75977700  |
| H | 8.23799900  | -4.02722900 | -1.05904400 |
| H | 8.52400600  | -6.14616200 | 2.67791800  |
| C | 9.89237100  | -5.73907900 | 0.32237100  |
| H | 10.25184700 | -5.26579500 | -0.60068000 |
| H | 10.67327600 | -5.61898600 | 1.08994500  |
| H | 9.80431400  | -6.81731300 | 0.12301200  |
| C | 0.89678000  | -3.73653500 | 0.94431000  |
| C | -0.44488200 | -3.90454900 | 1.03171600  |
| C | -1.07833200 | -3.87476000 | 2.32620700  |
| C | -0.29414600 | -3.68831900 | 3.52129700  |
| O | -2.34715700 | -4.00339300 | 2.51383800  |
| H | -1.05999200 | -4.04942600 | 0.14817800  |
| H | 1.35659300  | -3.75760900 | -0.04014600 |
| C | 1.04119500  | -3.50901100 | 3.42626500  |
| H | 2.40862000  | -4.47108800 | 2.19649400  |
| H | 1.61988800  | -3.35216100 | 4.33365300  |
| H | -0.82126400 | -3.67480100 | 4.46980600  |
| H | -2.90367700 | -4.11258300 | 1.71024200  |

1-4) Y-axis (Electric field : 0.0001 au)

|   |             |             |             |
|---|-------------|-------------|-------------|
| C | 0.00000000  | 0.00000000  | 0.00000000  |
| C | 0.00000000  | 0.00000000  | 1.39697600  |
| C | 1.23045000  | 0.00000000  | -0.68678000 |
| O | -1.14386200 | 0.03234700  | -0.74967200 |
| C | 1.20148300  | -0.09670900 | 2.10296800  |
| H | -0.94439900 | 0.03514100  | 1.93526100  |
| C | 2.42993300  | -0.17633200 | 1.43393700  |
| H | 1.17117000  | -0.12227200 | 3.18929800  |
| C | 2.42138800  | -0.10607900 | 0.03136800  |
| C | 3.71551700  | -0.34140800 | 2.22975300  |
| H | 3.33998000  | -0.14389400 | -0.54750500 |
| O | 1.28020800  | -0.01018400 | -2.06316700 |
| C | 0.90931900  | 1.22127600  | -2.70855400 |
| H | 1.58745800  | 2.02775900  | -2.40348500 |
| H | 1.01138600  | 1.04107100  | -3.78039000 |
| H | -0.12471100 | 1.49228200  | -2.47506500 |
| H | -1.92302200 | -0.00997300 | -0.17057000 |



|   |             |             |             |
|---|-------------|-------------|-------------|
| C | 4.75661400  | 0.72712000  | 1.87715000  |
| C | 4.32689300  | -1.80275900 | 2.15239500  |
| H | 3.47451800  | -0.19951800 | 3.28880600  |
| H | 5.07888400  | 0.66815900  | 0.83056300  |
| H | 4.30985700  | 1.71580200  | 2.04123600  |
| O | 5.87701900  | 0.53984400  | 2.74083300  |
| C | 6.96641300  | 1.36780300  | 2.60870100  |
| C | 7.04217800  | 2.44019000  | 1.71530400  |
| C | 8.05389800  | 1.08576000  | 3.44997400  |
| C | 8.20929700  | 3.21770600  | 1.67165300  |
| H | 6.21716000  | 2.68397400  | 1.05519900  |
| C | 9.20139600  | 1.87085600  | 3.39016900  |
| H | 7.98453800  | 0.24927900  | 4.13982700  |
| C | 9.30613500  | 2.95447200  | 2.49781300  |
| H | 8.25411400  | 4.04717500  | 0.96890700  |
| H | 10.03528900 | 1.63445800  | 4.04804400  |
| C | 10.56460300 | 3.79147800  | 2.43754400  |
| H | 11.42957000 | 3.19217100  | 2.12522300  |
| H | 10.45783200 | 4.61777100  | 1.72662300  |
| H | 10.80925300 | 4.22022700  | 3.41771400  |
| C | 4.80173600  | -2.23476500 | 0.81617400  |
| C | 4.51452100  | -3.45352000 | 0.29033200  |
| C | 3.69349400  | -4.35686500 | 1.03381900  |
| C | 3.18037700  | -4.01490200 | 2.32104200  |
| O | 3.37321100  | -5.54551900 | 0.58139300  |
| H | 4.89833300  | -3.75581600 | -0.67943600 |
| H | 5.44137800  | -1.55909100 | 0.25601800  |
| C | 3.47451600  | -2.79845200 | 2.84611700  |
| H | 5.24678200  | -1.71284200 | 2.76923000  |
| H | 3.09244500  | -2.53265300 | 3.82792200  |
| H | 2.56923700  | -4.74215200 | 2.84451400  |
| H | 3.75046000  | -5.73775600 | -0.29996800 |

1-5) Y-axis (Electric field : 0.001 au)

|   |             |             |             |
|---|-------------|-------------|-------------|
| C | 0.00000000  | 0.00000000  | 0.00000000  |
| C | 0.00000000  | 0.00000000  | 1.39882500  |
| C | 1.23622700  | 0.00000000  | -0.67211700 |
| O | -1.13474300 | 0.27824300  | -0.74425900 |
| C | 1.11590300  | -0.52311600 | 2.06722800  |
| H | -0.93003400 | 0.17118300  | 1.93620200  |
| C | 2.26981000  | -0.90753300 | 1.35946400  |
| H | 1.05879800  | -0.69169600 | 3.13960900  |
| C | 2.34043200  | -0.54551900 | 0.00174200  |
| C | 3.37175700  | -1.69962900 | 2.06722200  |

|   |             |             |             |
|---|-------------|-------------|-------------|
| H | 3.23154600  | -0.74188000 | -0.58832800 |
| O | 1.36071200  | 0.22789700  | -2.02620900 |
| C | 0.89834900  | 1.48213700  | -2.51599100 |
| H | 1.43896600  | 2.30942200  | -2.02766100 |
| H | 1.12130200  | 1.48549500  | -3.58610000 |
| H | -0.17873500 | 1.60420000  | -2.36453500 |
| H | -1.87395800 | -0.25078500 | -0.39707500 |
| C | 4.78895300  | -1.28673700 | 1.59779400  |
| C | 3.16948800  | -3.26901200 | 2.06191100  |
| H | 3.32546300  | -1.42468600 | 3.12856900  |
| H | 5.08829400  | -1.80755500 | 0.68202500  |
| H | 4.78680400  | -0.21180300 | 1.38409400  |
| O | 5.78989900  | -1.45531700 | 2.60906400  |
| C | 6.36461500  | -2.73739300 | 2.74827200  |
| C | 7.07284000  | -3.33524800 | 1.70264900  |
| C | 6.24444000  | -3.38933700 | 3.97715700  |
| C | 7.62322400  | -4.60845000 | 1.88488000  |
| H | 7.18152300  | -2.83042900 | 0.74523700  |
| C | 6.81235700  | -4.65777000 | 4.14678700  |
| H | 5.68921000  | -2.92059600 | 4.78640400  |
| C | 7.49691600  | -5.30202000 | 3.10235000  |
| H | 8.15111900  | -5.08004000 | 1.05976200  |
| H | 6.69587400  | -5.16795600 | 5.09955500  |
| C | 8.03997500  | -6.69974600 | 3.26479300  |
| H | 7.30156800  | -7.43950800 | 2.92994800  |
| H | 8.94239700  | -6.85613100 | 2.66611000  |
| H | 8.27011800  | -6.92655700 | 4.30968400  |
| C | 3.26200200  | -4.00564300 | 0.76563300  |
| C | 2.62100500  | -5.18087400 | 0.54068800  |
| C | 1.71921500  | -5.69573200 | 1.53607800  |
| C | 1.41825800  | -4.92776500 | 2.71576600  |
| O | 1.12372100  | -6.83964600 | 1.44892400  |
| H | 2.79132600  | -5.75179500 | -0.36725000 |
| H | 3.96083700  | -3.65255400 | 0.01279400  |
| C | 2.07707100  | -3.76909900 | 2.94857400  |
| H | 4.07594600  | -3.63435800 | 2.59798400  |
| H | 1.89062400  | -3.23199000 | 3.87499100  |
| H | 0.69602800  | -5.33881600 | 3.41347000  |
| H | 1.36579600  | -7.39660800 | 0.67620800  |

1-6) Z-axis (Electric field : 0.0001 au)

|   |            |            |            |
|---|------------|------------|------------|
| C | 0.00000000 | 0.00000000 | 0.00000000 |
| C | 0.00000000 | 0.00000000 | 1.39718700 |

|   |             |             |             |
|---|-------------|-------------|-------------|
| C | 1.22492100  | 0.00000000  | -0.69578700 |
| O | -1.14908300 | 0.00547900  | -0.74107200 |
| C | 1.20904000  | -0.06371400 | 2.09732000  |
| H | -0.94346600 | 0.01832600  | 1.93751700  |
| C | 2.43572600  | -0.10493900 | 1.42035600  |
| H | 1.18872600  | -0.08885600 | 3.18408200  |
| C | 2.41978900  | -0.05042700 | 0.01811400  |
| C | 3.73742100  | -0.19447700 | 2.20031300  |
| H | 3.33739400  | -0.05726600 | -0.56282300 |
| O | 1.26515200  | -0.04034200 | -2.06938900 |
| C | 0.88274500  | 1.17439700  | -2.74574300 |
| H | 1.55798600  | 1.99097700  | -2.46412800 |
| H | 0.98128900  | 0.96632500  | -3.81237600 |
| H | -0.15163700 | 1.44364700  | -2.51351300 |
| H | -1.92524400 | -0.00116900 | -0.15686900 |
| C | 4.58782900  | 1.06828200  | 2.01953000  |
| C | 4.57010400  | -1.51377700 | 1.90027700  |
| H | 3.48997100  | -0.26188600 | 3.26532500  |
| H | 4.84880200  | 1.23876600  | 0.96801300  |
| H | 4.00601400  | 1.93037400  | 2.36894600  |
| O | 5.77193000  | 0.91764600  | 2.80268400  |
| C | 6.71250900  | 1.92250300  | 2.78408200  |
| C | 6.57104400  | 3.12616600  | 2.08788600  |
| C | 7.87732800  | 1.68319000  | 3.52913800  |
| C | 7.60093000  | 4.07699400  | 2.14219900  |
| H | 5.68254400  | 3.34118600  | 1.50473000  |
| C | 8.88624500  | 2.64157500  | 3.56984800  |
| H | 7.97750400  | 0.74300200  | 4.06474700  |
| C | 8.77197500  | 3.86028900  | 2.87522800  |
| H | 7.47742000  | 5.00684500  | 1.59139700  |
| H | 9.78445200  | 2.43659500  | 4.14921300  |
| C | 9.88170200  | 4.88707000  | 2.91883100  |
| H | 10.81029700 | 4.49126200  | 2.48784400  |
| H | 9.61174700  | 5.78705000  | 2.35686100  |
| H | 10.10907200 | 5.18962500  | 3.94905200  |
| C | 5.21665700  | -1.58927000 | 0.56825800  |
| C | 5.12867500  | -2.68203600 | -0.23464000 |
| C | 4.35596700  | -3.80109200 | 0.20018800  |
| C | 3.70625500  | -3.81570400 | 1.47169800  |
| O | 4.20880200  | -4.87772000 | -0.53568700 |
| H | 5.62986300  | -2.71966100 | -1.19751400 |
| H | 5.81944700  | -0.74613200 | 0.24401700  |
| C | 3.80585900  | -2.72723500 | 2.27600800  |
| H | 5.41191700  | -1.43406800 | 2.61906700  |
| H | 3.31025900  | -2.72634100 | 3.24309000  |

|   |            |             |             |
|---|------------|-------------|-------------|
| H | 3.14432600 | -4.69940700 | 1.75403400  |
| H | 4.66382200 | -4.81618300 | -1.39878200 |

1-7) Z-axis (Electric field : 0.001 au)

|   |             |             |             |
|---|-------------|-------------|-------------|
| C | 0.00000000  | 0.00000000  | 0.00000000  |
| C | 0.00000000  | 0.00000000  | 1.39821900  |
| C | 1.18091700  | 0.00000000  | -0.76474100 |
| O | -1.19257000 | 0.03888700  | -0.67413300 |
| C | 1.23918000  | -0.20088800 | 2.05277300  |
| H | -0.93656800 | 0.04672400  | 1.94655800  |
| C | 2.43570200  | -0.30184800 | 1.30694100  |
| H | 1.26492000  | -0.30516600 | 3.13850100  |
| C | 2.37954300  | -0.13953400 | -0.07508500 |
| C | 3.78974800  | -0.63393700 | 1.94056800  |
| H | 3.26844800  | -0.14419300 | -0.68932400 |
| O | 1.27154700  | 0.01812800  | -2.10357800 |
| C | 0.30369000  | 0.66604400  | -2.97867500 |
| H | 0.06312600  | 1.66243100  | -2.60022700 |
| H | 0.81397200  | 0.74143300  | -3.93772800 |
| H | -0.59475400 | 0.05826700  | -3.07576400 |
| H | -1.94243600 | 0.00822300  | -0.06054300 |
| C | 4.37221900  | 0.60096600  | 2.63489900  |
| C | 4.81897800  | -1.33061200 | 0.95537600  |
| H | 3.61472100  | -1.37677300 | 2.73211800  |
| H | 4.78744700  | 1.31660100  | 1.91916400  |
| H | 3.58303500  | 1.10072200  | 3.20848600  |
| O | 5.40792100  | 0.17281400  | 3.55683400  |
| C | 6.08156100  | 1.10654300  | 4.27316500  |
| C | 5.87882300  | 2.49302900  | 4.17753600  |
| C | 7.05020300  | 0.62047300  | 5.17184400  |
| C | 6.64859900  | 3.36250900  | 4.95837000  |
| H | 5.15974200  | 2.90528900  | 3.47926300  |
| C | 7.80378900  | 1.50529500  | 5.94166700  |
| H | 7.22184800  | -0.45174400 | 5.22019700  |
| C | 7.62430000  | 2.89673300  | 5.84980600  |
| H | 6.49858000  | 4.43334600  | 4.83499400  |
| H | 8.57589500  | 1.10453600  | 6.59924700  |
| C | 8.51318500  | 3.85775400  | 6.61106900  |
| H | 8.84877600  | 3.42690900  | 7.56560600  |
| H | 9.41386600  | 4.11085800  | 6.03505000  |
| H | 7.99532000  | 4.80151300  | 6.82275500  |
| C | 5.49119600  | -0.49036700 | -0.09189300 |
| C | 5.71364100  | -0.90737900 | -1.36398400 |

|   |            |             |             |
|---|------------|-------------|-------------|
| C | 5.21007800 | -2.18731100 | -1.78737300 |
| C | 4.50323000 | -3.03496500 | -0.86030000 |
| O | 5.33403800 | -2.65307800 | -2.98454200 |
| H | 6.23502100 | -0.27919200 | -2.08044800 |
| H | 5.87419100 | 0.48427900  | 0.19621300  |
| C | 4.29284000 | -2.62058200 | 0.40973300  |
| H | 5.65761300 | -1.62217800 | 1.62039500  |
| H | 3.73430100 | -3.25937500 | 1.08979200  |
| H | 4.12511000 | -3.98042600 | -1.23528700 |
| H | 5.77906700 | -2.06827500 | -3.63904400 |

2) Basis set : 6-31+G(3df,2p)

2-1) Normal Optimization (without electric field)

|   |             |             |             |
|---|-------------|-------------|-------------|
| C | 3.77849900  | -1.99478400 | 0.70719900  |
| C | 3.34060600  | -1.53392600 | 1.94359300  |
| C | 2.18187600  | -0.77425700 | 2.04299100  |
| C | 1.43217200  | -0.45387900 | 0.91280700  |
| C | 1.87379200  | -0.93085900 | -0.32351400 |
| C | 3.02772600  | -1.69309700 | -0.43912900 |
| H | 3.91534800  | -1.76520200 | 2.83200500  |
| H | 1.86330600  | -0.42881500 | 3.01770700  |
| H | 1.33338300  | -0.72426600 | -1.23772500 |
| O | 3.45285300  | -2.08082300 | -1.68439600 |
| C | 3.28735500  | -3.47300000 | -1.99064600 |
| H | 2.22924000  | -3.74159300 | -1.97323300 |
| H | 3.68189400  | -3.61459000 | -2.99325100 |
| H | 3.83844100  | -4.09806100 | -1.28875300 |
| O | 4.91804700  | -2.72175400 | 0.54825500  |
| H | 5.34072900  | -2.86522200 | 1.40242200  |
| C | 0.16731800  | 0.36761400  | 1.05855500  |
| C | -1.05701800 | -0.37175300 | 0.51993000  |
| H | -0.96762900 | -0.59341300 | -0.54623000 |
| H | -1.14381700 | -1.32133800 | 1.05383500  |
| O | -2.19879900 | 0.43972900  | 0.75782900  |
| C | -3.43136200 | -0.01942600 | 0.37546800  |
| C | -3.66256400 | -1.26286700 | -0.20297100 |
| C | -4.50410200 | 0.84568100  | 0.60284000  |
| C | -4.96538600 | -1.62662900 | -0.54789800 |
| H | -2.85508900 | -1.95474800 | -0.38893300 |
| C | -5.78807100 | 0.46387900  | 0.25326000  |
| H | -4.31460600 | 1.81052600  | 1.05393600  |
| C | -6.04846500 | -0.78186100 | -0.33094400 |

|   |             |             |             |
|---|-------------|-------------|-------------|
| H | -5.12882200 | -2.59863800 | -0.99682900 |
| H | -6.60689400 | 1.14872800  | 0.43806900  |
| C | -7.45206500 | -1.18212500 | -0.70660200 |
| H | -7.87982900 | -0.49277700 | -1.43749600 |
| H | -7.47580000 | -2.18210500 | -1.13759900 |
| H | -8.11306700 | -1.17641000 | 0.16243600  |
| C | 2.26352200  | 3.41179800  | -0.81769400 |
| C | 1.34538100  | 2.67355700  | -1.61405400 |
| C | 0.40821600  | 1.91538500  | -1.00602500 |
| C | 0.27868900  | 1.83154800  | 0.45941600  |
| C | 1.25540100  | 2.64489000  | 1.20592100  |
| C | 2.19739700  | 3.39835000  | 0.60139800  |
| H | 1.41216400  | 2.73309300  | -2.69179500 |
| H | -0.30106200 | 1.36812600  | -1.61188500 |
| H | 1.19644600  | 2.62551100  | 2.28634600  |
| H | 2.90806400  | 3.99281800  | 1.15642200  |
| O | 3.20463700  | 4.14546100  | -1.34880600 |
| H | 3.20485900  | 4.11619100  | -2.31804900 |
| H | -0.00606000 | 0.52431000  | 2.12349600  |
| H | -0.71859300 | 2.25153400  | 0.68864800  |

2-2) X-axis (Electric field : 0.0001 au)

|   |             |             |             |
|---|-------------|-------------|-------------|
| C | 0.00000000  | 0.00000000  | 0.00000000  |
| C | 0.00000000  | 0.00000000  | 1.39041700  |
| C | 1.22698500  | 0.00000000  | -0.68226000 |
| O | -1.13525600 | 0.00935600  | -0.74686200 |
| C | 1.19327300  | -0.06055100 | 2.09668500  |
| H | -0.94292800 | 0.02825200  | 1.92214500  |
| C | 2.41752700  | -0.12160200 | 1.43479700  |
| H | 1.16001300  | -0.06801700 | 3.17822900  |
| C | 2.41106400  | -0.07741000 | 0.03859100  |
| C | 3.69461500  | -0.26481500 | 2.23686400  |
| H | 3.32703200  | -0.10638800 | -0.53578600 |
| O | 1.28330800  | -0.02325400 | -2.05178700 |
| C | 0.88818600  | 1.18609300  | -2.71739200 |
| H | 1.55064000  | 2.00655100  | -2.43409600 |
| H | 0.98398200  | 0.99213600  | -3.78228500 |
| H | -0.14299100 | 1.44601400  | -2.48421800 |
| H | -1.91287800 | 0.00947100  | -0.17689300 |
| C | 4.83542800  | 0.60133600  | 1.70978600  |
| C | 4.14527400  | -1.78320700 | 2.40424800  |
| H | 3.49505200  | 0.07539900  | 3.25335700  |
| H | 5.14979700  | 0.31589600  | 0.70376100  |
| H | 4.49220700  | 1.63798200  | 1.67575600  |

|   |             |             |             |
|---|-------------|-------------|-------------|
| O | 5.93014400  | 0.47076700  | 2.61032700  |
| C | 7.08164200  | 1.16293500  | 2.35987200  |
| C | 7.26189600  | 2.03237100  | 1.28864900  |
| C | 8.12568300  | 0.96299100  | 3.26702600  |
| C | 8.48310200  | 2.69093400  | 1.13766100  |
| H | 6.47408700  | 2.21142900  | 0.57288000  |
| C | 9.32827300  | 1.62752600  | 3.09811900  |
| H | 7.97589600  | 0.28649300  | 4.09782100  |
| C | 9.53473900  | 2.50782000  | 2.02897600  |
| H | 8.60564900  | 3.36543500  | 0.29910000  |
| H | 10.12432700 | 1.45970900  | 3.81379700  |
| C | 10.84739900 | 3.23010400  | 1.86274700  |
| H | 11.68283600 | 2.52955300  | 1.80082900  |
| H | 10.85192100 | 3.83688600  | 0.95807500  |
| H | 11.04709500 | 3.89186100  | 2.70850400  |
| C | 4.37979300  | -2.48853300 | 1.13126200  |
| C | 3.81633400  | -3.68005500 | 0.84192700  |
| C | 2.95576900  | -4.29142600 | 1.79643800  |
| C | 2.70235200  | -3.69437900 | 3.06050300  |
| O | 2.36726500  | -5.43298700 | 1.56527500  |
| H | 4.00017400  | -4.17975400 | -0.09943000 |
| H | 5.04035000  | -2.03043500 | 0.40773200  |
| C | 3.26720100  | -2.50289500 | 3.34533800  |
| H | 5.12722700  | -1.68802100 | 2.90114300  |
| H | 3.07974500  | -2.03710400 | 4.30405100  |
| H | 2.05754700  | -4.21141900 | 3.75577000  |
| H | 2.56720000  | -5.79399300 | 0.68763700  |

2-3) X-axis (Electric field : 0.001 au)

|   |             |             |             |
|---|-------------|-------------|-------------|
| C | 0.00000000  | 0.00000000  | 0.00000000  |
| C | 0.00000000  | 0.00000000  | 1.39878600  |
| C | 1.26131500  | 0.00000000  | -0.62904200 |
| O | -1.07406900 | 0.25291900  | -0.76223900 |
| C | 1.03625700  | -0.59530400 | 2.08654900  |
| H | -0.90292700 | 0.29413900  | 1.91971000  |
| C | 2.11875700  | -1.11727000 | 1.37501800  |
| H | 0.93757400  | -0.75155800 | 3.15185500  |
| C | 2.26860400  | -0.71270700 | 0.04272300  |
| C | 2.83566900  | -2.30859100 | 1.98912200  |
| H | 3.12959900  | -1.00152300 | -0.54884600 |
| O | 1.50953900  | 0.35208200  | -1.91925200 |
| C | 0.73871300  | 1.41337100  | -2.52269400 |
| H | 0.60061200  | 2.23528000  | -1.82143000 |
| H | 1.32566400  | 1.74773500  | -3.37472500 |
| H | -0.23031900 | 1.05642500  | -2.85534900 |

|   |             |             |             |
|---|-------------|-------------|-------------|
| H | -1.89581900 | 0.28723500  | -0.25107300 |
| C | 4.07857000  | -2.70489600 | 1.20941500  |
| C | 1.81217600  | -3.52295900 | 2.14125200  |
| H | 3.16289200  | -2.06195900 | 3.00241900  |
| H | 3.83637200  | -3.20442100 | 0.27012700  |
| H | 4.67530800  | -1.81618600 | 0.99413600  |
| O | 4.87409300  | -3.60054900 | 2.02219800  |
| C | 6.06633800  | -4.01179400 | 1.57415700  |
| C | 6.62278100  | -3.66974400 | 0.33592400  |
| C | 6.80161100  | -4.84584700 | 2.43402800  |
| C | 7.88037100  | -4.15575300 | -0.01693800 |
| H | 6.07777700  | -3.04932800 | -0.35837700 |
| C | 8.04789400  | -5.31599600 | 2.06120400  |
| H | 6.36002300  | -5.12221400 | 3.38198800  |
| C | 8.61894400  | -4.98165400 | 0.82620600  |
| H | 8.27767800  | -3.89116200 | -0.99109300 |
| H | 8.58045100  | -5.97413100 | 2.74019500  |
| C | 9.95457100  | -5.54743400 | 0.40592800  |
| H | 10.34137900 | -5.02556200 | -0.47209100 |
| H | 10.69986800 | -5.46391600 | 1.20436500  |
| H | 9.88183100  | -6.60869100 | 0.14702500  |
| C | 0.92634600  | -3.72113400 | 0.95620500  |
| C | -0.40593000 | -3.89480800 | 1.04012000  |
| C | -1.04263200 | -3.86322000 | 2.32698200  |
| C | -0.26555000 | -3.66497900 | 3.51819100  |
| O | -2.30390000 | -3.99915900 | 2.50454300  |
| H | -1.01609000 | -4.04674000 | 0.15955600  |
| H | 1.38844100  | -3.74256100 | -0.02212200 |
| C | 1.06076600  | -3.48179000 | 3.42685000  |
| H | 2.43457100  | -4.43160000 | 2.21101200  |
| H | 1.63463100  | -3.31791200 | 4.33052400  |
| H | -0.79330800 | -3.65008200 | 4.46123200  |
| H | -2.84989700 | -4.11593300 | 1.70412100  |

2-4) Y-axis (Electric field : 0.0001 au)

|   |             |             |             |
|---|-------------|-------------|-------------|
| C | 0.00000000  | 0.00000000  | 0.00000000  |
| C | 0.00000000  | 0.00000000  | 1.38988100  |
| C | 1.22544500  | 0.00000000  | -0.68418400 |
| O | -1.13859700 | 0.02982600  | -0.74605500 |
| C | 1.19456700  | -0.09646500 | 2.09314600  |
| H | -0.94178000 | 0.03520700  | 1.92340000  |
| C | 2.41681800  | -0.17522700 | 1.42822600  |
| H | 1.16457800  | -0.12154700 | 3.17461100  |
| C | 2.40934600  | -0.10606100 | 0.03288700  |



|   |             |             |             |
|---|-------------|-------------|-------------|
| C | 3.69750100  | -0.33958800 | 2.22284500  |
| H | 3.32484200  | -0.14247100 | -0.54240900 |
| O | 1.27498100  | -0.00763700 | -2.05468400 |
| C | 0.92048200  | 1.22227800  | -2.69994200 |
| H | 1.61279300  | 2.01570200  | -2.41001300 |
| H | 1.00324500  | 1.04112100  | -3.76831700 |
| H | -0.10019900 | 1.51568100  | -2.45694600 |
| H | -1.91189300 | -0.01044600 | -0.17222000 |
| C | 4.74167700  | 0.71839500  | 1.86904100  |
| C | 4.30040300  | -1.80084500 | 2.15269100  |
| H | 3.45575600  | -0.19320600 | 3.27609900  |
| H | 5.07215000  | 0.64460100  | 0.83058400  |
| H | 4.29479700  | 1.70573700  | 2.01053500  |
| O | 5.84826100  | 0.54463400  | 2.74489100  |
| C | 6.94140800  | 1.35470300  | 2.60612000  |
| C | 7.03281200  | 2.40527200  | 1.69887100  |
| C | 8.01735900  | 1.08125400  | 3.45440000  |
| C | 8.20155300  | 3.16701000  | 1.64749900  |
| H | 6.21720000  | 2.64315400  | 1.03291900  |
| C | 9.16616700  | 1.85027700  | 3.38678900  |
| H | 7.93748600  | 0.26203700  | 4.15628400  |
| C | 9.28546800  | 2.91074600  | 2.47996500  |
| H | 8.25797500  | 3.97970000  | 0.93351800  |
| H | 9.99028900  | 1.61963000  | 4.05102300  |
| C | 10.54868500 | 3.73009600  | 2.41012200  |
| H | 11.39898700 | 3.12233700  | 2.09310400  |
| H | 10.44710700 | 4.55319000  | 1.70363300  |
| H | 10.80418700 | 4.15218600  | 3.38406400  |
| C | 4.76821300  | -2.24052600 | 0.82444900  |
| C | 4.47351900  | -3.45276300 | 0.31010900  |
| C | 3.65444300  | -4.34534100 | 1.05755000  |
| C | 3.15040800  | -3.99382100 | 2.33955600  |
| O | 3.33146700  | -5.52718000 | 0.61212800  |
| H | 4.84917900  | -3.76258400 | -0.65546400 |
| H | 5.40469900  | -1.57221900 | 0.26074800  |
| C | 3.45184300  | -2.78390700 | 2.85353200  |
| H | 5.21895100  | -1.70996000 | 2.76422800  |
| H | 3.07733800  | -2.50980800 | 3.83102800  |
| H | 2.54052100  | -4.71190800 | 2.86770100  |
| H | 3.70297000  | -5.72258200 | -0.26258600 |

2-5) Y-axis (Electric field : 0.001 au)

|   |            |            |            |
|---|------------|------------|------------|
| C | 0.00000000 | 0.00000000 | 0.00000000 |
| C | 0.00000000 | 0.00000000 | 1.39290800 |

|   |             |             |             |
|---|-------------|-------------|-------------|
| C | 1.22962600  | 0.00000000  | -0.66760400 |
| O | -1.12515500 | 0.29068700  | -0.73697300 |
| C | 1.11744700  | -0.49928700 | 2.06068800  |
| H | -0.92389900 | 0.17515800  | 1.93022900  |
| C | 2.27500400  | -0.86351800 | 1.36280600  |
| H | 1.06293800  | -0.65938200 | 3.12975400  |
| C | 2.33870500  | -0.51348100 | 0.00859100  |
| C | 3.38401500  | -1.63135000 | 2.07522600  |
| H | 3.23634300  | -0.69032000 | -0.56974300 |
| O | 1.30129100  | 0.32060300  | -2.00306300 |
| C | 1.21355400  | -0.81752900 | -2.89480600 |
| H | 0.26103300  | -1.32918900 | -2.76451900 |
| H | 1.28870800  | -0.42512800 | -3.90553100 |
| H | 2.02931900  | -1.51461200 | -2.70891100 |
| H | -1.88416900 | -0.14835600 | -0.33531600 |
| C | 4.79153600  | -1.20640700 | 1.60429400  |
| C | 3.20369300  | -3.19900500 | 2.07954800  |
| H | 3.33364600  | -1.35069600 | 3.12989100  |
| H | 5.07985200  | -1.70735600 | 0.67934900  |
| H | 4.77917100  | -0.13300900 | 1.40490600  |
| O | 5.79610000  | -1.38870300 | 2.60031000  |
| C | 6.37941700  | -2.66294100 | 2.71374500  |
| C | 7.03256500  | -3.26398800 | 1.64388500  |
| C | 6.32279800  | -3.30546800 | 3.94421300  |
| C | 7.59076800  | -4.52864500 | 1.80547300  |
| H | 7.09415700  | -2.76882600 | 0.68296300  |
| C | 6.89764200  | -4.56516000 | 4.09210900  |
| H | 5.80966600  | -2.83514500 | 4.77348400  |
| C | 7.52735300  | -5.21183900 | 3.02485100  |
| H | 8.07668800  | -5.00190500 | 0.96190500  |
| H | 6.83121700  | -5.06710600 | 5.04876700  |
| C | 8.07715100  | -6.60273600 | 3.16835100  |
| H | 7.31649400  | -7.34131900 | 2.90579600  |
| H | 8.92570500  | -6.77117500 | 2.50755100  |
| H | 8.38366200  | -6.81134700 | 4.19162800  |
| C | 3.30897700  | -3.93942400 | 0.79476900  |
| C | 2.68736000  | -5.11649500 | 0.57785000  |
| C | 1.80058800  | -5.64113000 | 1.57336200  |
| C | 1.49321300  | -4.87537800 | 2.74592200  |
| O | 1.23372300  | -6.79060700 | 1.48878300  |
| H | 2.86115500  | -5.68825100 | -0.32359900 |
| H | 3.99771100  | -3.57868100 | 0.04290600  |
| C | 2.13070500  | -3.71274600 | 2.97016100  |
| H | 4.11392800  | -3.54770300 | 2.61340800  |
| H | 1.93811300  | -3.17451400 | 3.88927100  |

|   |            |             |            |
|---|------------|-------------|------------|
| H | 0.78253900 | -5.29243900 | 3.44500000 |
| H | 1.48145600 | -7.33652500 | 0.71937600 |

2-6) Z-axis (Electric field : 0.0001 au)

|   |             |             |             |
|---|-------------|-------------|-------------|
| C | 0.00000000  | 0.00000000  | 0.00000000  |
| C | 0.00000000  | 0.00000000  | 1.39008100  |
| C | 1.21985300  | 0.00000000  | -0.69329600 |
| O | -1.14391700 | 0.00355300  | -0.73735500 |
| C | 1.20221400  | -0.06326100 | 2.08733300  |
| H | -0.94085500 | 0.01745000  | 1.92563200  |
| C | 2.42285800  | -0.10316700 | 1.41466100  |
| H | 1.18219600  | -0.08834300 | 3.16921000  |
| C | 2.40782400  | -0.05013300 | 0.01959800  |
| C | 3.71942600  | -0.18953400 | 2.19446100  |
| H | 3.32174100  | -0.05482300 | -0.55862200 |
| O | 1.26000300  | -0.03780900 | -2.06095900 |
| C | 0.89227100  | 1.17504100  | -2.73727700 |
| H | 1.58334300  | 1.97799700  | -2.47407000 |
| H | 0.96732300  | 0.96470900  | -3.80040400 |
| H | -0.12768500 | 1.46800500  | -2.49264000 |
| H | -1.91421200 | -0.00156900 | -0.15850800 |
| C | 4.56800200  | 1.06881000  | 2.01521400  |
| C | 4.55062400  | -1.50589400 | 1.89934100  |
| H | 3.46984200  | -0.25582600 | 3.25401100  |
| H | 4.83694700  | 1.23119600  | 0.96897900  |
| H | 3.98124800  | 1.92892500  | 2.34724900  |
| O | 5.73925700  | 0.92884700  | 2.80988100  |
| C | 6.67948100  | 1.92421000  | 2.78660800  |
| C | 6.54725800  | 3.11492000  | 2.08000500  |
| C | 7.83421700  | 1.69318100  | 3.53787800  |
| C | 7.57403300  | 4.05894800  | 2.12957200  |
| H | 5.66661200  | 3.32422000  | 1.49182400  |
| C | 8.83995100  | 2.64414600  | 3.57330100  |
| H | 7.92872500  | 0.76336300  | 4.08287800  |
| C | 8.73379500  | 3.84900500  | 2.86796200  |
| H | 7.45698500  | 4.97921000  | 1.57073600  |
| H | 9.72978700  | 2.44452500  | 4.15834200  |
| C | 9.84336200  | 4.86837600  | 2.90443700  |
| H | 10.75858500 | 4.47459300  | 2.45713600  |
| H | 9.56943800  | 5.77006700  | 2.35851900  |
| H | 10.08649500 | 5.15651800  | 3.92912100  |
| C | 5.19104300  | -1.58672300 | 0.57276000  |
| C | 5.10332600  | -2.67792100 | -0.21759400 |
| C | 4.34008500  | -3.79323200 | 0.22401100  |

|   |            |             |             |
|---|------------|-------------|-------------|
| C | 3.69775500 | -3.80066500 | 1.49306200  |
| O | 4.19760600 | -4.86673700 | -0.50332900 |
| H | 5.59774900 | -2.72112900 | -1.17866900 |
| H | 5.78492200 | -0.74531900 | 0.24281300  |
| C | 3.79641500 | -2.71364100 | 2.28500300  |
| H | 5.39148400 | -1.41969900 | 2.61256000  |
| H | 3.30718000 | -2.70651100 | 3.25028500  |
| H | 3.14269300 | -4.68079000 | 1.78256700  |
| H | 4.64777300 | -4.80776700 | -1.36062100 |

2-7) Z-axis (Electric field : 0.001 au)

|   |             |             |             |
|---|-------------|-------------|-------------|
| C | 0.00000000  | 0.00000000  | 0.00000000  |
| C | 0.00000000  | 0.00000000  | 1.39107200  |
| C | 1.17485200  | 0.00000000  | -0.76389300 |
| O | -1.18925400 | 0.02329800  | -0.66957700 |
| C | 1.23630700  | -0.16731700 | 2.04504700  |
| H | -0.93406900 | 0.03943600  | 1.93464700  |
| C | 2.42855400  | -0.25584300 | 1.30314200  |
| H | 1.26303800  | -0.25634300 | 3.12687600  |
| C | 2.36883600  | -0.11822600 | -0.07319800 |
| C | 3.78668500  | -0.54424000 | 1.94016800  |
| H | 3.25264300  | -0.12001200 | -0.68631200 |
| O | 1.26929100  | 0.01527600  | -2.09451900 |
| C | 0.28471600  | 0.60594500  | -2.98359500 |
| H | -0.01497900 | 1.58495000  | -2.61740600 |
| H | 0.79837200  | 0.70619800  | -3.93318900 |
| H | -0.57541800 | -0.04529600 | -3.09225900 |
| H | -1.93281300 | 0.00466100  | -0.06034400 |
| C | 4.29435400  | 0.68160600  | 2.69601000  |
| C | 4.86256700  | -1.14348900 | 0.94890900  |
| H | 3.63919200  | -1.32524800 | 2.69281900  |
| H | 4.70342800  | 1.43708900  | 2.02529500  |
| H | 3.46842600  | 1.12670400  | 3.25292200  |
| O | 5.31050200  | 0.26254800  | 3.63869200  |
| C | 5.86152300  | 1.17236800  | 4.46287700  |
| C | 5.58306900  | 2.54308200  | 4.44296700  |
| C | 6.77943800  | 0.68478800  | 5.40457500  |
| C | 6.22116800  | 3.39201400  | 5.34284300  |
| H | 4.90241000  | 2.95869400  | 3.71601700  |
| C | 7.40201300  | 1.54931100  | 6.29152500  |
| H | 7.01119100  | -0.37220300 | 5.39895300  |
| C | 7.13900700  | 2.92306300  | 6.28119700  |
| H | 6.01048700  | 4.45334500  | 5.28260800  |
| H | 8.13306500  | 1.14871600  | 6.98704400  |

|   |            |             |             |
|---|------------|-------------|-------------|
| C | 7.88388200 | 3.87185600  | 7.18872400  |
| H | 7.28971700 | 4.76077800  | 7.40918100  |
| H | 8.14988800 | 3.39350400  | 8.13620700  |
| H | 8.81396500 | 4.21700500  | 6.72847800  |
| C | 5.48116700 | -0.23884300 | -0.06722000 |
| C | 5.74112100 | -0.60937100 | -1.33753200 |
| C | 5.33525300 | -1.90690000 | -1.79299200 |
| C | 4.68433500 | -2.81783100 | -0.89417600 |
| O | 5.50139900 | -2.32957600 | -2.99230400 |
| H | 6.21987600 | 0.06693700  | -2.03316600 |
| H | 5.78626600 | 0.75084300  | 0.24511200  |
| C | 4.43772300 | -2.45021100 | 0.37451400  |
| H | 5.71195400 | -1.39300300 | 1.61087900  |
| H | 3.92423100 | -3.13872000 | 1.03387800  |
| H | 4.38006400 | -3.77602700 | -1.29053200 |
| H | 5.90695900 | -1.70527000 | -3.62394900 |
